# Supplementary material
Source: PubMed Central journal article supplement (PMC8274941)
Supplement: NIHMS1713241-supplement-Supple_figs.pdf [file NIHMS1713241-supplement-Supple_figs.pdf]

## Supporting Information

| <b>Supporting Information Table of Contents</b> |                                                               | <b>Page</b> |
|-------------------------------------------------|---------------------------------------------------------------|-------------|
| Figure S1.                                      | Analytical HPLC and ESI-mass spectra of pure peptides         | S-2         |
| Figure S2.                                      | Rheology measurements of peptide gels                         | S-3         |
| Figure S3.                                      | 2D culture of HDFs on gels with DMEM or FBS-supplemented DMEM | S-4         |

**a. AcVES3-RGDV**

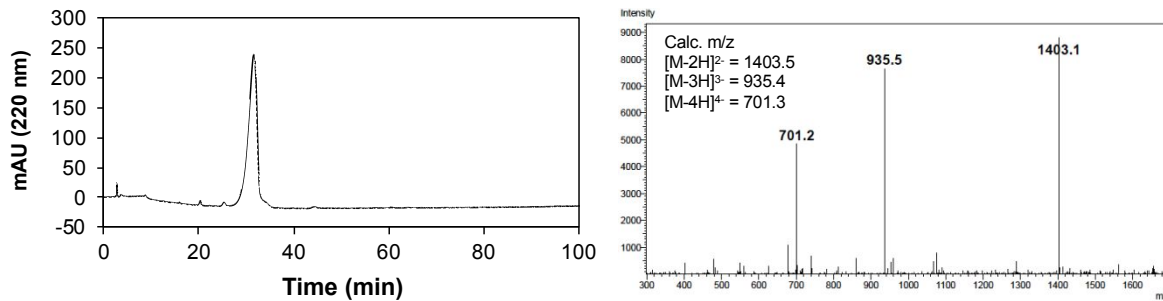

**b. AcVES3-RGEV**

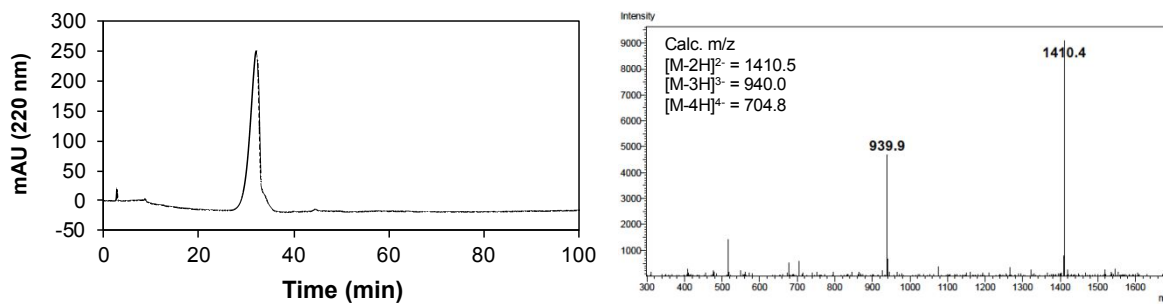

**c. AcVES3**

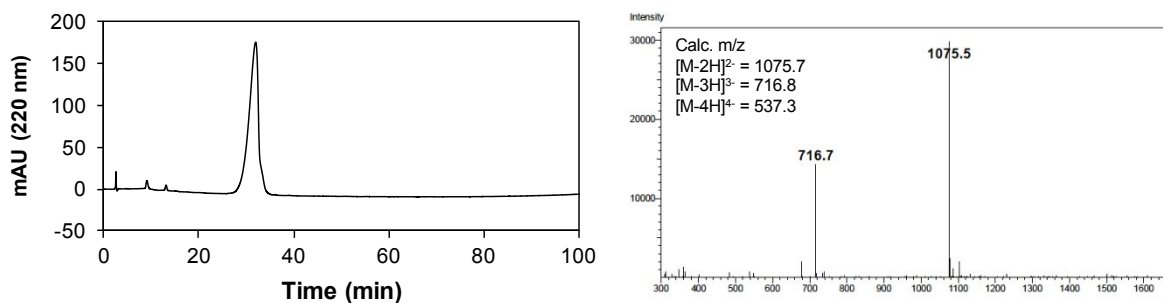

**Figure S1.** Analytical HPLC and ESI-mass spectra of AcVES3-RGDV (a), AcVES3-RGEV (b), and AcVES3 (c).

### a. AcVES3-RGDV

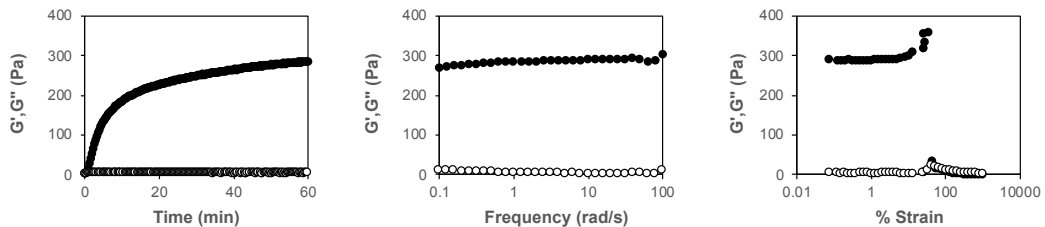

### b. AcVES3-RGEV

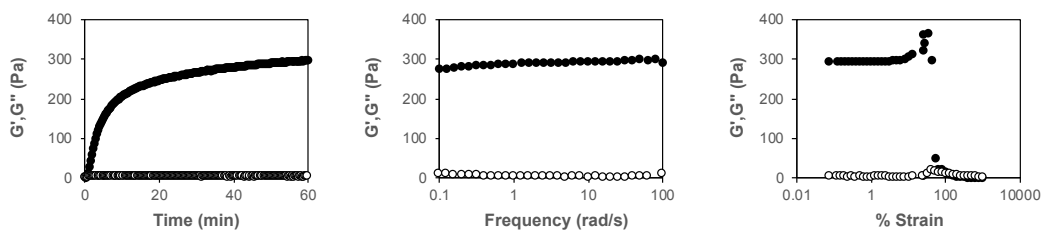

### c. AcVES3

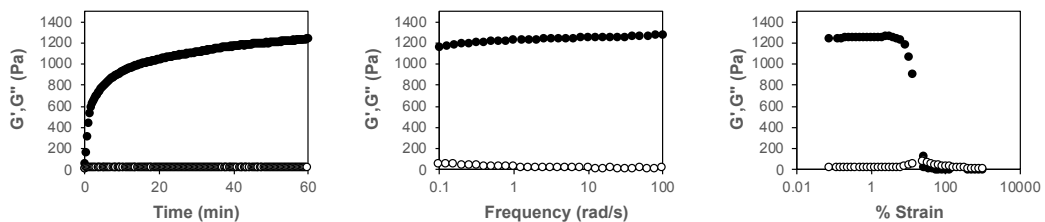

**Figure S2.** Dynamic time sweep (left), dynamic frequency sweep (middle), and dynamic strain sweep (right) were measured with 0.5 wt% AcVES3-RGDV (a), 0.5 wt% AcVES3-RGEV (b), and 0.5 wt% AcVES3 (c) in HEPES buffer (25 mM HEPES, 150 mM NaCl, pH 7.4) by monitoring the storage ( $G'$ , solid symbol) and loss ( $G''$ , open symbol) moduli.

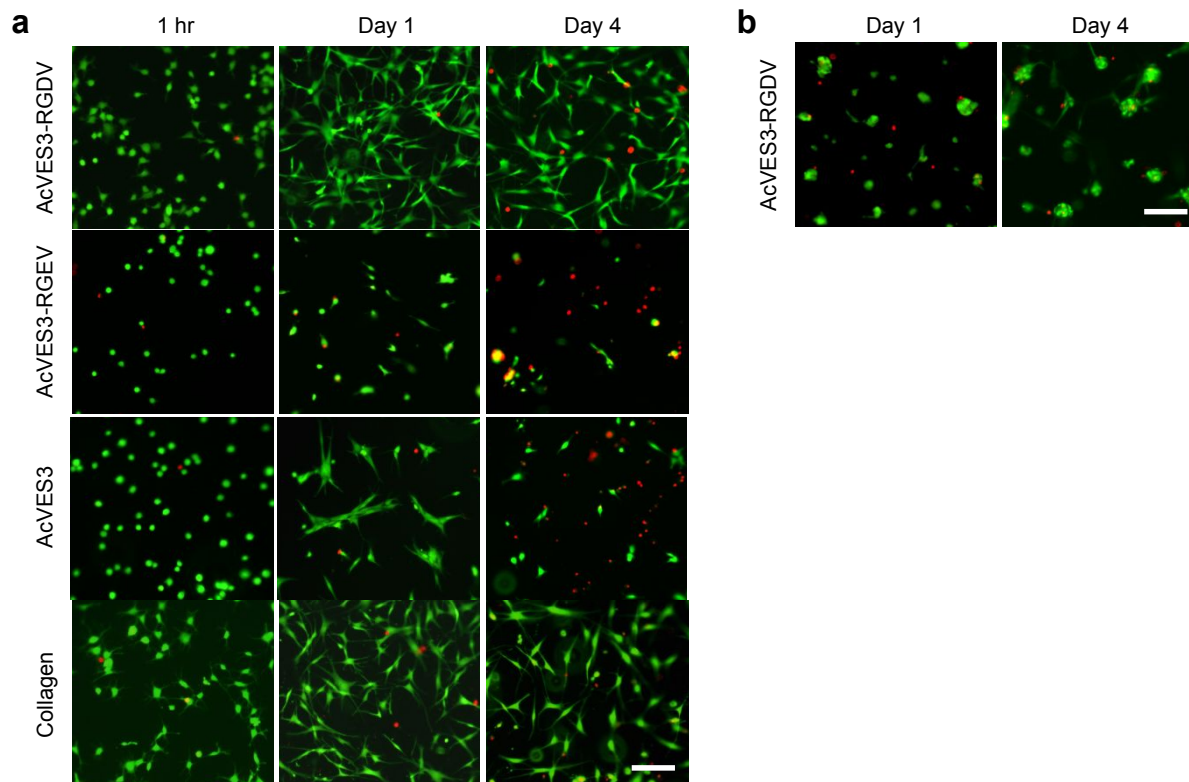

**Figure S3.** Two-dimensional culture of HDFs on surface of 0.5 wt% peptide gels or 0.3 wt% collagen gels with DMEM (a) or FBS-supplemented DMEM (b). Live cells and dead cells were visualized using calcein AM and ethidium homodimer-1, respectively. Scale bar = 100  $\mu$ m.
